# Supplementary material for: Polypropylene-grafted graphene oxide sheets as multifunctional compatibilizers for polyolefin-based polymer blends
Source: Royal Society of Chemistry journal article supplement (doi:10.1039/c2jm31477k), 2012-01-01
Supplement: c2jm31477k.pdf [file c2jm31477k.pdf]

*Supplementary Information for*

# **Polypropylene-grafted graphene oxide sheets as multifunctional compatibilizers for polyolefin-based polymer blends**

Yewen Cao, Jiachun Feng\* and Peiyi Wu

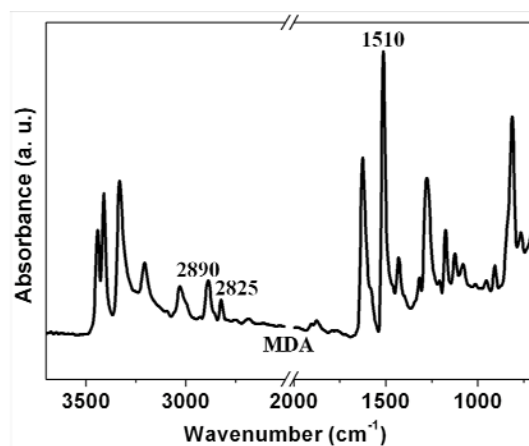

**Fig. S1** FTIR spectrum of MDA.

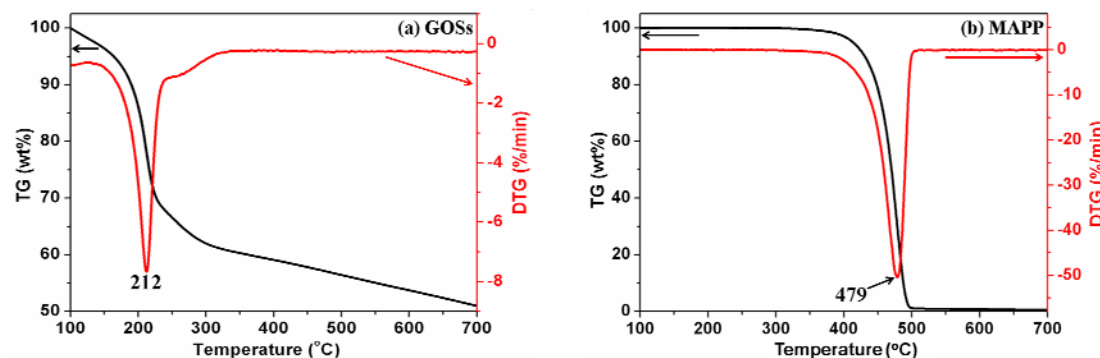

**Fig. S2** TG and DTG curves for (a) GOSs and (b) MAPP.

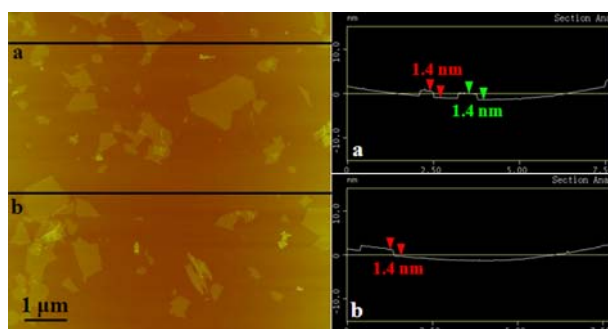

**Fig. S3** AFM image (left) and height profiles (right) of GOSs.

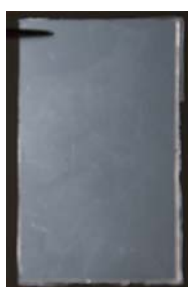

**Fig. S4** Photograph of neat PP.

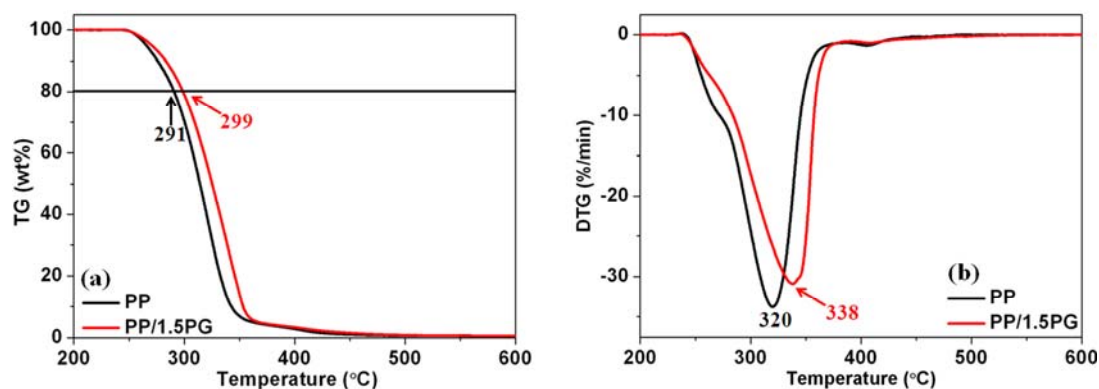

**Fig. S5** (a) TG and (b) DTG traces for neat PP and PP/1.5PG.

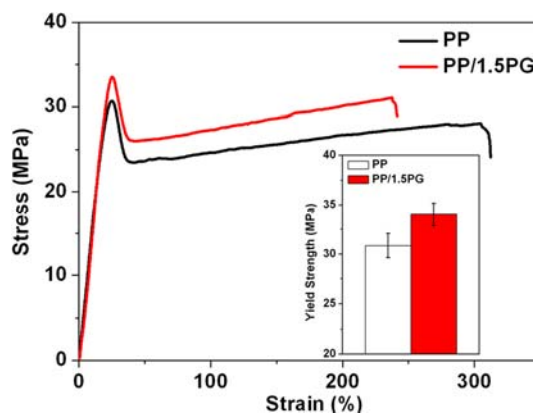

**Fig. S6** Typical stress-strain curves for neat PP and PP/1.5PG. The inset is the yield strength values of neat PP and PP/1.5PG.
